# Supplementary material for: Effect of Rice Straw and Stubble Burning on Soil Physicochemical Properties and Bacterial Communities in Central Thailand
Source: MDPI journal article supplement (doi:10.3390/biology12040501), 2023-03-26
Supplement: s1 [file s1]

## Supplementary material

**Table S1.** The enzyme classification numbers and their description.

| E.C. number | Description                   |
|-------------|-------------------------------|
| EC:3.1.3.2  | Acid phosphatase              |
| EC:3.2.1.1  | Alpha-amylase                 |
| EC:3.2.1.50 | Alpha-N-acetylglucosaminidase |
| EC:3.5.1.4  | Amidase                       |
| EC:3.1.6.1  | Arylsulfatase                 |
| EC:3.2.1.21 | Beta-glucosidase              |
| EC:3.2.1.4  | Cellulase                     |
| EC:3.2.1.14 | Chitinase                     |
| EC:3.2.1.8  | Endo-1,4-beta-xylanase        |
| EC:1.10.3.2 | Laccase                       |
| EC:4.2.2.10 | Pectin lyase                  |
| EC:1.11.1.7 | Peroxidase                    |
| EC:3.5.1.5  | Urease                        |
| EC:3.2.1.37 | Xylan 1,4-beta-xylosidase     |
| EC:3.1.3.1  | Alkaline phosphatase          |
